# Supplementary material for: Generation and Efficacy of Two Chimeric Viruses Derived from GPE− Vaccine Strain as Classical Swine Fever Vaccine Candidates
Source: MDPI journal article supplement (doi:10.3390/v15071587), 2023-07-20
Supplement: s1 [file s1]

**Table S1.** Virus recovery from blood samples and neutralizing antibody in pigs inoculated with vGPE-/PAPeV E<sup>rns</sup> or vGPE-/PhoPeV E<sup>rns</sup>

| Virus                         | Pig ID | Virus recovery at dpi (log <sub>10</sub> TCID <sub>50</sub> /mL) |   |   |   |   |    |    | Neutralizing antibody titer at dpi |    |
|-------------------------------|--------|------------------------------------------------------------------|---|---|---|---|----|----|------------------------------------|----|
|                               |        | 0                                                                | 3 | 5 | 7 | 9 | 11 | 14 | 0                                  | 14 |
| vGPE-/PAPeV E <sup>rns</sup>  | #293   | –                                                                | – | – | – | – | –  | –  | <1                                 | 2  |
|                               | #294   | –                                                                | – | – | – | – | –  | –  | <1                                 | 8  |
|                               | #295   | –                                                                | – | – | – | – | –  | –  | <1                                 | 4  |
|                               | #296   | –                                                                | – | – | – | – | –  | –  | <1                                 | 2  |
|                               | #297   | –                                                                | – | – | – | – | –  | –  | <1                                 | 8  |
| vGPE-/PhoPeV E <sup>rns</sup> | #374   | –                                                                | – | – | – | – | –  | –  | <1                                 | 1  |
|                               | #375   | –                                                                | – | – | – | – | –  | –  | <1                                 | 2  |
|                               | #376   | –                                                                | – | – | – | – | –  | –  | <1                                 | 2  |
|                               | #377   | –                                                                | – | – | – | – | –  | –  | <1                                 | 2  |
|                               | #378   | –                                                                | – | – | – | – | –  | –  | <1                                 | <1 |

–: not isolated.

**Table S2.** Virus recovery from organ samples in pigs inoculated with vGPE-/PAPeV E<sup>rms</sup> or vGPE-/PhoPeV E<sup>rms</sup>

| Virus                         | Pig ID | Virus recovery (log <sub>10</sub> TCID <sub>50</sub> /g) |       |        |        |                  |                          |       |
|-------------------------------|--------|----------------------------------------------------------|-------|--------|--------|------------------|--------------------------|-------|
|                               |        | Tonsil                                                   | Brain | Spleen | Kidney | Adrenal<br>grand | Mesenteric<br>lymph node | Colon |
| vGPE-/PAPeV E <sup>rms</sup>  | #293   | –                                                        | –     | –      | –      | –                | –                        | –     |
|                               | #294   | –                                                        | –     | –      | –      | –                | –                        | –     |
|                               | #295   | –                                                        | –     | –      | –      | –                | –                        | –     |
|                               | #296   | –                                                        | –     | –      | –      | –                | –                        | –     |
|                               | #297   | –                                                        | –     | –      | –      | –                | –                        | –     |
| vGPE-/PhoPeV E <sup>rms</sup> | #374   | –                                                        | –     | –      | –      | –                | –                        | –     |
|                               | #375   | –                                                        | –     | –      | –      | –                | –                        | –     |
|                               | #376   | –                                                        | –     | –      | –      | –                | –                        | –     |
|                               | #377   | –                                                        | –     | –      | –      | –                | –                        | –     |
|                               | #378   | –                                                        | –     | –      | –      | –                | –                        | –     |

–: not isolated.

**Table S3.** Virus recovery from blood samples in pigs inoculated with vGPE<sup>-</sup>, vGPE<sup>-</sup>/PApEV E<sup>rns</sup>, or vGPE<sup>-</sup>/PhoPeV E<sup>rns</sup> at different doses of TCID<sub>50</sub>

| Virus                                      | TCID <sub>50</sub> | Pig ID | Virus recovery at dpi (log <sub>10</sub> TCID <sub>50</sub> /mL) |   |    |    |
|--------------------------------------------|--------------------|--------|------------------------------------------------------------------|---|----|----|
|                                            |                    |        | 0                                                                | 7 | 14 | 21 |
| vGPE <sup>-</sup> /PApEV E <sup>rns</sup>  | 10 <sup>3.0</sup>  | #312   | -                                                                | - | -  | -  |
|                                            |                    | #313   | -                                                                | - | -  | -  |
|                                            |                    | #314   | -                                                                | - | -  | -  |
|                                            | 10 <sup>4.0</sup>  | #315   | -                                                                | - | -  | -  |
|                                            |                    | #316   | -                                                                | - | -  | -  |
|                                            |                    | #317   | -                                                                | - | -  | -  |
|                                            | 10 <sup>5.0</sup>  | #318   | -                                                                | - | -  | -  |
|                                            |                    | #319   | -                                                                | - | -  | -  |
|                                            |                    | #320   | -                                                                | - | -  | -  |
| vGPE <sup>-</sup> /PhoPeV E <sup>rns</sup> | 10 <sup>3.0</sup>  | #354   | -                                                                | - | -  | -  |
|                                            |                    | #355   | -                                                                | - | -  | -  |
|                                            |                    | #356   | -                                                                | - | -  | -  |
|                                            | 10 <sup>4.0</sup>  | #357   | -                                                                | - | -  | -  |
|                                            |                    | #358   | -                                                                | - | -  | -  |
|                                            |                    | #359   | -                                                                | - | -  | -  |
|                                            | 10 <sup>5.0</sup>  | #360   | -                                                                | - | -  | -  |
|                                            |                    | #361   | -                                                                | - | -  | NC |
|                                            |                    | #362   | -                                                                | - | -  | -  |
| vGPE <sup>-</sup>                          | 10 <sup>3.0</sup>  | #303   | -                                                                | - | -  | -  |
|                                            |                    | #304   | -                                                                | - | -  | -  |
|                                            |                    | #305   | -                                                                | - | -  | -  |
|                                            | 10 <sup>4.0</sup>  | #306   | -                                                                | - | -  | -  |
|                                            |                    | #307   | -                                                                | - | -  | -  |
|                                            |                    | #308   | -                                                                | - | -  | -  |
|                                            | 10 <sup>5.0</sup>  | #309   | -                                                                | - | -  | -  |
|                                            |                    | #310   | -                                                                | - | -  | -  |
|                                            |                    | #311   | -                                                                | - | -  | -  |

-: not isolated, NC: no sample collection due to the pig being dead on 18 dpi.
